# Supplementary material for: Influence of intrinsic defects on the structure and dynamics of the mixed Pb–Sn perovskite: first-principles DFT and NAMD simulations
Source: Royal Society of Chemistry journal article supplement (doi:10.1039/d1ta09027e), 2021-11-24
Supplement: d1ta09027e1.pdf [file d1ta09027e1.pdf]

# Influence of Intrinsic Defects on Structure and Dynamics of Mixed Pb-Sn Perovskite: First-Principles DFT and NAMD Simulations

Qi Liu<sup>a</sup>, Akang Li<sup>a</sup>, WeiBin Chu<sup>b</sup>, Oleg V. Prezhdo<sup>b,\*</sup> and WanZhen Liang<sup>a,\*</sup>

<sup>a</sup>*State Key Laboratory of Physical Chemistry of Solid Surfaces, Collaborative Innovation Center of Chemistry for Energy Materials, Fujian Provincial Key Laboratory of Theoretical and Computational Chemistry, and Department of Chemistry, College of Chemistry and Chemical Engineering, Xiamen University, Xiamen, Fujian 361005, People's Republic of China*

<sup>b</sup>*Department of Chemistry, University of Southern California, Los Angeles, California 90089, United States; Department of Physics and Astronomy, University of Southern California, Los Angeles, California 90089, United States*

E-mail: prezhdo@usc.edu, liangwz@xmu.edu.cn

Table S1: The main geometric parameters and DFEs of mix Pb-Sn perovskite  $\text{MASn}_{0.03125}\text{Pb}_{0.96875}\text{I}_3$  with and without defects. Notice that the defect-induced geometric data are only available for the defect-surrounded structures.

| Structures                        | pristine | $V_{\text{Sn}}$ | $V_{\text{Pb}}$ | $I_i$   |
|-----------------------------------|----------|-----------------|-----------------|---------|
| $d_{\text{Sn-I}}/\text{\AA}$      | 3.157    | 3.119           | 3.117           | 3.081   |
| $d_{\text{Pb-I}}/\text{\AA}$      | 3.202    | 3.206           | 3.212           | 3.204   |
| $\min(\angle \text{M-X-M})^\circ$ | 143.3    | 145.3           | 148.0           | 106.3   |
| DFE/(eV/cell)                     | -        | +0.0934         | +0.0907         | +0.0653 |

---

\*To whom correspondence should be addressed

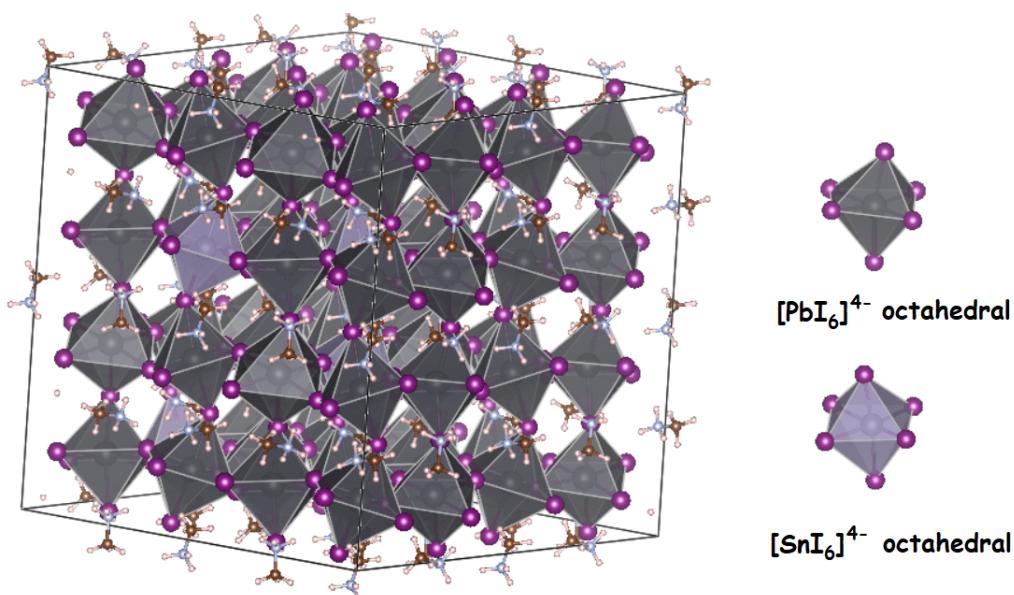

Figure S1: (a) Optimized alternative structures and (b) sketchmap of the MASn<sub>0.03125</sub>Pb<sub>0.96875</sub>I<sub>3</sub> perovskite without defects.

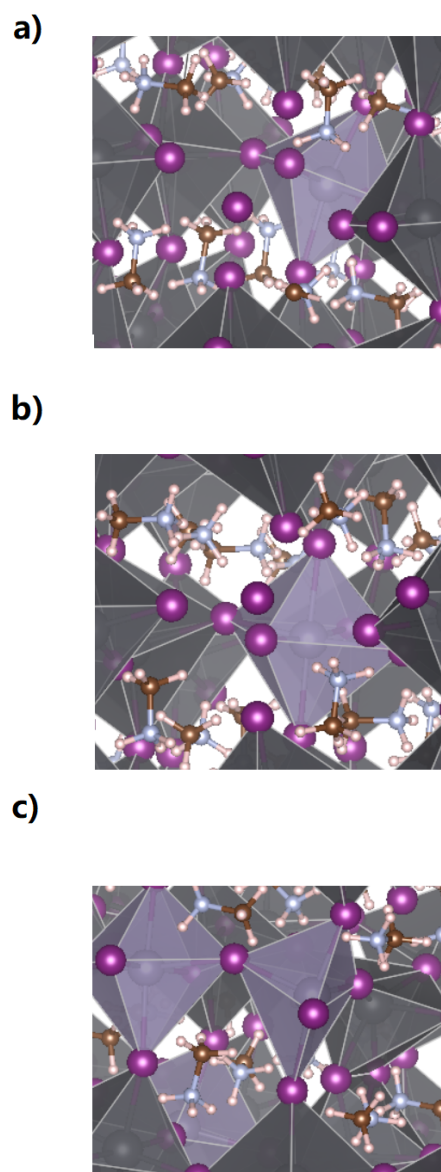

Figure S2: Optimized defect-bearing (a)  $V_{\text{Pb}}$  (b)  $V_{\text{Sn}}$  and (c)  $i_{\text{I}}$  structure in  $\text{MASn}_{0.03125}\text{Pb}_{0.96875}\text{I}_3$  lattice.

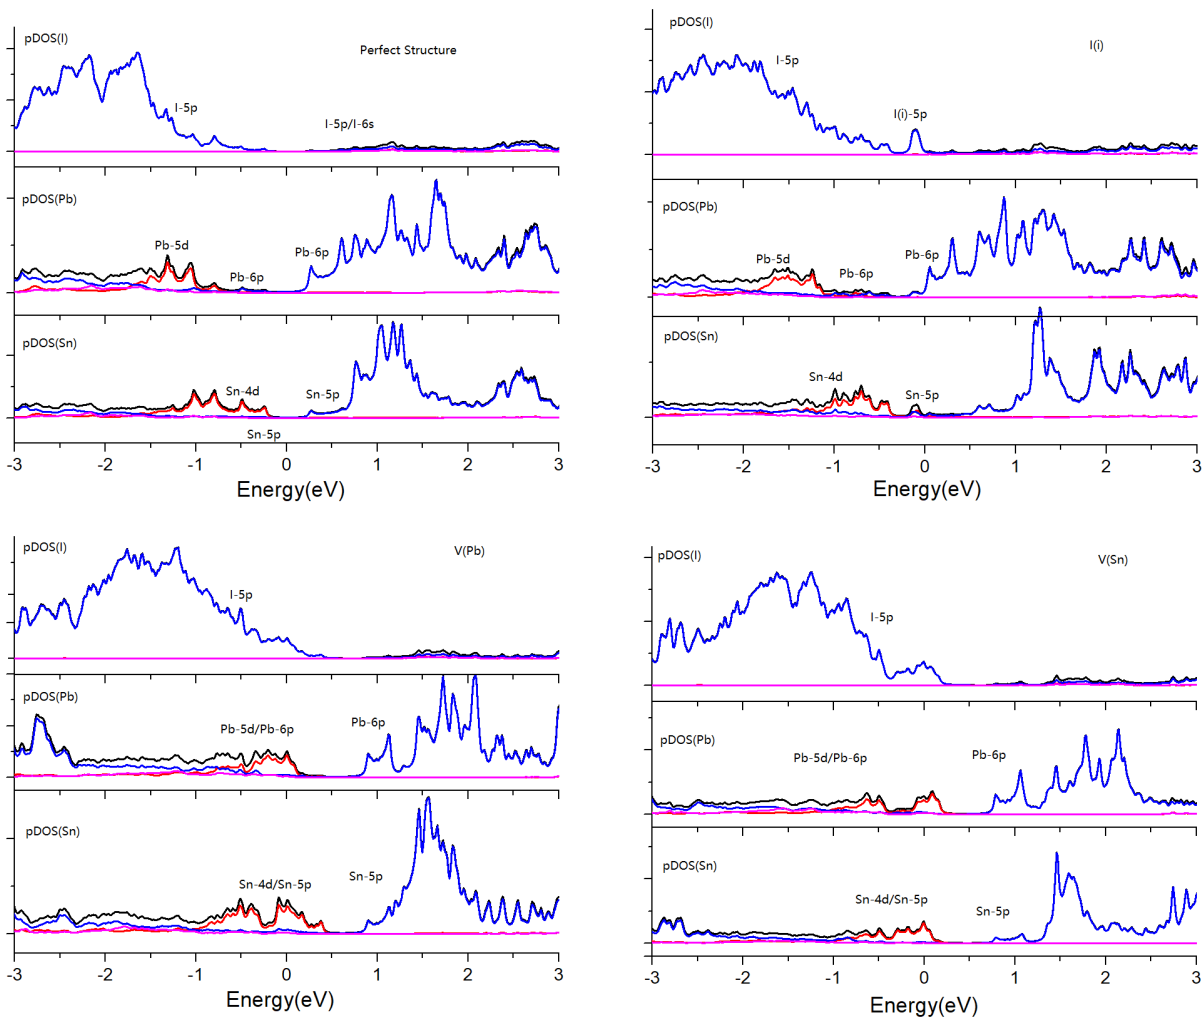

Figure S3: Projected density-of-states of the pristine and defect-bearing  $\text{MA}_2\text{SnPbI}_6$  perovskites calculated with PBE+SOC.

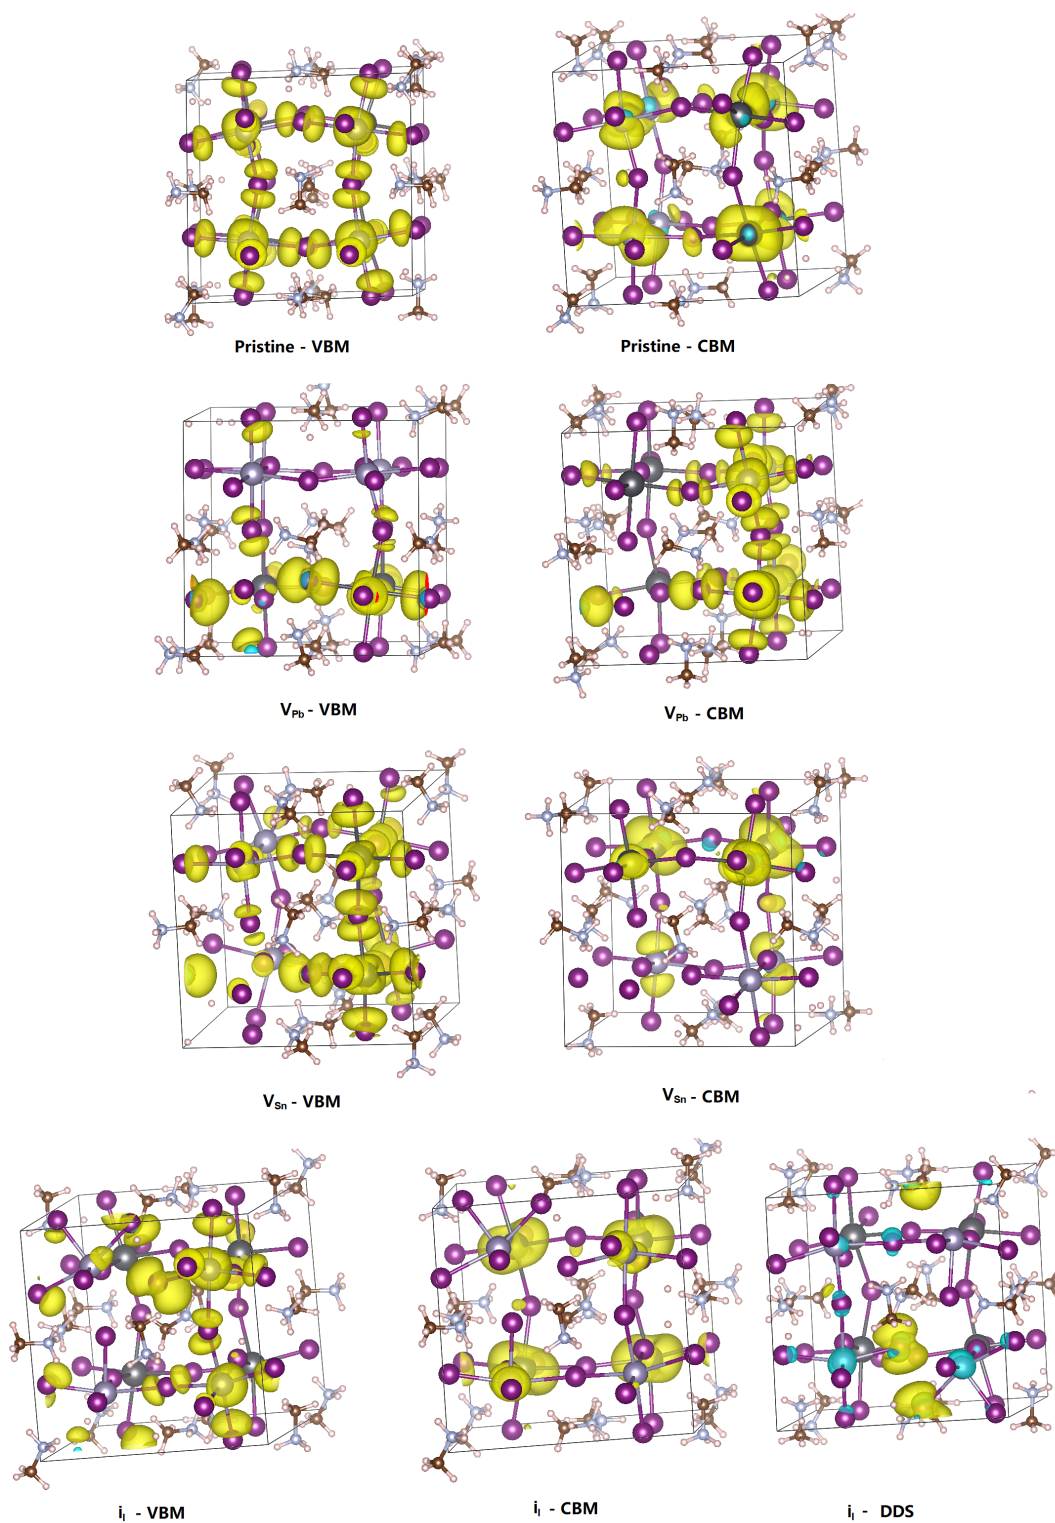

Figure S4: Charge distributions of the key states in the pristine and defect-bearing  $\text{MA}_2\text{SnPbI}_6$  perovskites calculated with PBE+SOC.

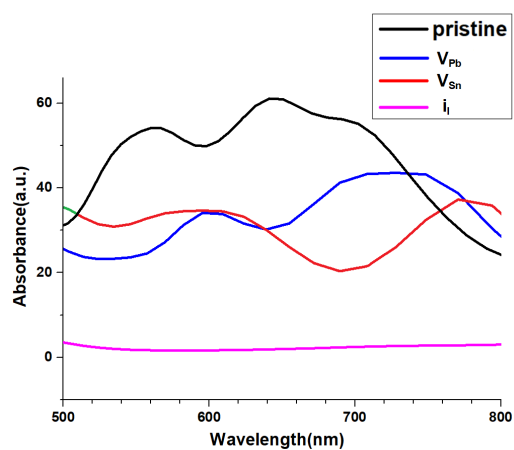

Figure S5: Calculated absorption spectra of the pristine and defect-bearing  $MA_2SnPbI_6$  perovskite in visible region.

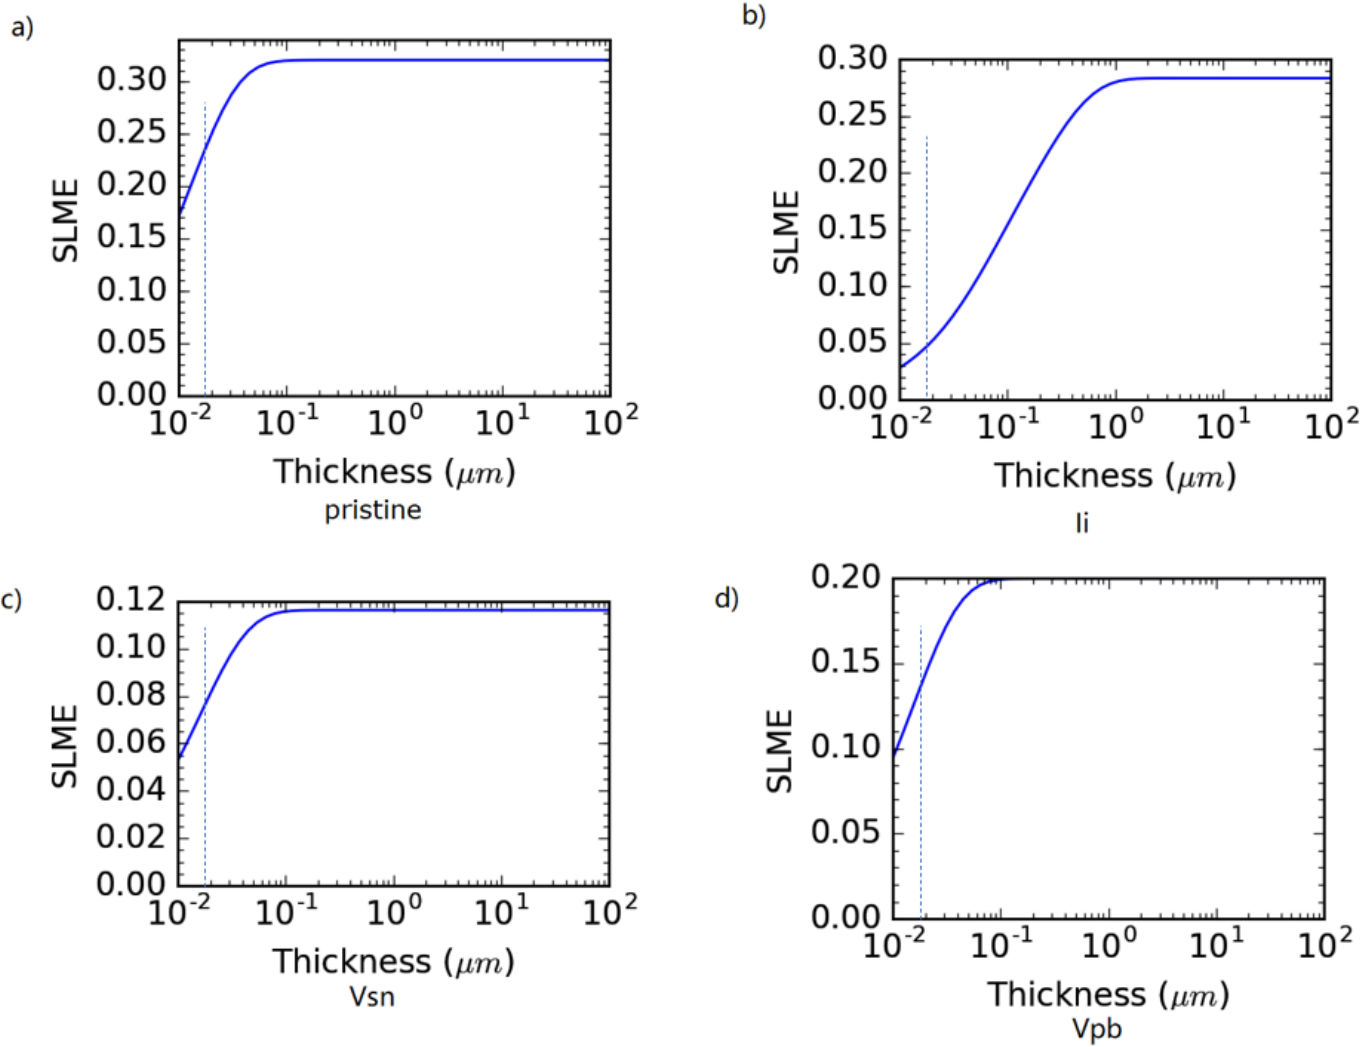

Figure S6: Calculated spectral-limited maximum efficiency of the pristine and defect-bearing  $MA_2SnPbI_6$  perovskites.

| pristine | vbm-5  | vbm-4  | vbm-3  | vbm-2  | vbm-1  | vbm    | cbm    | cbm+1  | cbm+2  | cbm+3  | cbm+4  |
|----------|--------|--------|--------|--------|--------|--------|--------|--------|--------|--------|--------|
| vbm-5    | 0      | 35.902 | 9.5771 | 4.3208 | 2.6885 | 1.5663 | 0.5137 | 0.4358 | 0.5154 | 0.5139 | 0.5077 |
| vbm-4    | 35.902 | 0      | 31.368 | 6.4004 | 3.4574 | 2.0092 | 0.4321 | 0.4635 | 0.549  | 0.4646 | 0.4961 |
| vbm-3    | 9.5771 | 31.368 | 0      | 28.02  | 5.2666 | 2.5546 | 0.4521 | 0.5757 | 0.5448 | 0.5885 | 0.5441 |
| vbm-2    | 4.3208 | 6.4004 | 28.02  | 0      | 21.784 | 4.49   | 0.5519 | 0.6068 | 0.6815 | 0.6022 | 0.5825 |
| vbm-1    | 2.6885 | 3.4574 | 5.2666 | 21.784 | 0      | 18.986 | 0.5143 | 0.5831 | 0.7014 | 0.7086 | 0.7109 |
| vbm      | 1.5663 | 2.0092 | 2.5546 | 4.49   | 18.986 | 0      | 0.5422 | 0.6074 | 0.8435 | 0.7191 | 0.617  |
| cbm      | 0.5137 | 0.4321 | 0.4521 | 0.5519 | 0.5143 | 0.5422 | 0      | 22.831 | 6.945  | 3.7015 | 2.8816 |
| cbm+1    | 0.4358 | 0.4635 | 0.5757 | 0.6068 | 0.5831 | 0.6074 | 22.831 | 0      | 31.344 | 7.4924 | 4.617  |
| cbm+2    | 0.5154 | 0.549  | 0.5448 | 0.6815 | 0.7014 | 0.8435 | 6.945  | 31.344 | 0      | 34.46  | 8.1881 |
| cbm+3    | 0.5139 | 0.4646 | 0.5885 | 0.6022 | 0.7086 | 0.7191 | 3.7015 | 7.4924 | 34.46  | 0      | 33.848 |
| cbm+4    | 0.5077 | 0.4961 | 0.5441 | 0.5825 | 0.7109 | 0.617  | 2.8816 | 4.617  | 8.1881 | 33.848 | 0      |

  

| V(Pb) | vbm-4  | vbm-3  | vbm-2  | vbm-1  | vbm    | cbm    | cbm+1  | cbm+2  | cbm+3  | cbm+4  | cbm+5  |
|-------|--------|--------|--------|--------|--------|--------|--------|--------|--------|--------|--------|
| vbm-4 | 0      | 37.255 | 5.9932 | 3.1349 | 1.0337 | 0.5232 | 0.6704 | 0.6561 | 0.6027 | 0.6305 | 0.5243 |
| vbm-3 | 37.255 | 0      | 22.812 | 5.511  | 1.1743 | 0.6111 | 0.5605 | 0.6437 | 0.5341 | 0.5197 | 0.6219 |
| vbm-2 | 5.9932 | 22.812 | 0      | 30.113 | 1.6419 | 0.5599 | 0.5427 | 0.6466 | 0.7703 | 0.672  | 0.6671 |
| vbm-1 | 3.1349 | 5.511  | 30.113 | 0      | 2.1693 | 0.4834 | 0.6544 | 0.5994 | 0.5372 | 0.5711 | 0.5767 |
| vbm   | 1.0337 | 1.1743 | 1.6419 | 2.1693 | 0      | 0.6533 | 0.6126 | 0.7148 | 0.6241 | 0.5961 | 0.5936 |
| cbm   | 0.5232 | 0.6111 | 0.5599 | 0.4834 | 0.6533 | 0      | 15.981 | 4.7635 | 2.0771 | 1.6992 | 1.2438 |
| cbm+1 | 0.6704 | 0.5605 | 0.5427 | 0.6544 | 0.6126 | 15.981 | 0      | 22.62  | 5.6193 | 4.0108 | 2.362  |
| cbm+2 | 0.6561 | 0.6437 | 0.6466 | 0.5994 | 0.7148 | 4.7635 | 22.62  | 0      | 29.322 | 8.147  | 4.9664 |
| cbm+3 | 0.6027 | 0.5341 | 0.7703 | 0.5372 | 0.6241 | 2.0771 | 5.6193 | 29.322 | 0      | 34.812 | 7.9962 |
| cbm+4 | 0.6305 | 0.5197 | 0.672  | 0.5711 | 0.5961 | 1.6992 | 4.0108 | 8.147  | 34.812 | 0      | 27.47  |
| cbm+5 | 0.5243 | 0.6219 | 0.6671 | 0.5767 | 0.5936 | 1.2438 | 2.362  | 4.9664 | 7.9962 | 27.47  | 0      |

  

| I(I)  | vbm-7  | vbm-6  | vbm-5  | vbm-4  | vbm-3  | vbm-2  | vbm-1  | vbm    | tr     | cbm    | cbm+1  |
|-------|--------|--------|--------|--------|--------|--------|--------|--------|--------|--------|--------|
| vbm-7 | 0      | 59.408 | 15.248 | 7.2117 | 4.1297 | 2.8308 | 1.8272 | 1.5081 | 0.8275 | 0.328  | 0.3008 |
| vbm-6 | 59.408 | 0      | 49.234 | 11.847 | 5.9334 | 3.2885 | 1.9193 | 1.7469 | 0.8102 | 0.3249 | 0.3264 |
| vbm-5 | 15.248 | 49.234 | 0      | 40.367 | 10.236 | 4.0499 | 2.2821 | 1.5671 | 1.0219 | 0.3498 | 0.3499 |
| vbm-4 | 7.2117 | 11.847 | 40.367 | 0      | 24.25  | 5.8946 | 2.8497 | 2.0329 | 1.0304 | 0.364  | 0.3619 |
| vbm-3 | 4.1297 | 5.9334 | 10.236 | 24.25  | 0      | 20.666 | 3.4127 | 2.6745 | 1.1727 | 0.3269 | 0.3718 |
| vbm-2 | 2.8308 | 3.2885 | 4.0499 | 5.8946 | 20.666 | 0      | 8.4177 | 4.2195 | 1.3354 | 0.3954 | 0.3806 |
| vbm-1 | 1.8272 | 1.9193 | 2.2821 | 2.8497 | 3.4127 | 8.4177 | 0      | 29.992 | 1.9649 | 0.4422 | 0.439  |
| vbm   | 1.5081 | 1.7469 | 1.5671 | 2.0329 | 2.6745 | 4.2195 | 29.992 | 0      | 2.2713 | 0.5183 | 0.5432 |
| tr    | 0.8275 | 0.8102 | 1.0219 | 1.0304 | 1.1727 | 1.3354 | 1.9649 | 2.2713 | 0      | 0.7631 | 0.7622 |
| cbm   | 0.328  | 0.3249 | 0.3498 | 0.364  | 0.3269 | 0.3954 | 0.4422 | 0.5183 | 0.7631 | 0      | 22.468 |
| cbm+1 | 0.3008 | 0.3264 | 0.3499 | 0.3619 | 0.3718 | 0.3806 | 0.439  | 0.5432 | 0.7622 | 22.468 | 0      |

  

| V(Sn) | vbm-5  | vbm-4  | vbm-3  | vbm-2  | vbm-1  | vbm    | cbm    | cbm+1  | cbm+2  | cbm+3  | cbm+4  |
|-------|--------|--------|--------|--------|--------|--------|--------|--------|--------|--------|--------|
| vbm-5 | 0      | 31.913 | 8.1234 | 2.8581 | 1.1803 | 0.7704 | 0.3522 | 0.4049 | 0.4311 | 0.3571 | 0.3967 |
| vbm-4 | 31.913 | 0      | 26.892 | 4.4115 | 1.2939 | 0.9466 | 0.3896 | 0.448  | 0.4888 | 0.4314 | 0.4466 |
| vbm-3 | 8.1234 | 26.892 | 0      | 11.578 | 1.3627 | 1.2927 | 0.5447 | 0.6203 | 0.5651 | 0.4769 | 0.4971 |
| vbm-2 | 2.8581 | 4.4115 | 11.578 | 0      | 3.4393 | 2.0326 | 0.5164 | 0.4742 | 0.5403 | 0.4697 | 0.5961 |
| vbm-1 | 1.1803 | 1.2939 | 1.3627 | 3.4393 | 0      | 7.6303 | 0.7924 | 0.7367 | 0.7342 | 0.6335 | 0.6403 |
| vbm   | 0.7704 | 0.9466 | 1.2927 | 2.0326 | 7.6303 | 0      | 1.2078 | 1.0741 | 0.8978 | 0.6664 | 0.7397 |
| cbm   | 0.3522 | 0.3896 | 0.5447 | 0.5164 | 0.7924 | 1.2078 | 0      | 16.986 | 3.2859 | 2.2332 | 1.3488 |
| cbm+1 | 0.4049 | 0.448  | 0.6203 | 0.4742 | 0.7367 | 1.0741 | 16.986 | 0      | 15.194 | 2.9743 | 1.8412 |
| cbm+2 | 0.4311 | 0.4888 | 0.5651 | 0.5403 | 0.7342 | 0.8978 | 3.2859 | 15.194 | 0      | 7.5185 | 2.9784 |
| cbm+3 | 0.3571 | 0.4314 | 0.4769 | 0.4697 | 0.6335 | 0.6664 | 2.2332 | 2.9743 | 7.5185 | 0      | 15.929 |
| cbm+4 | 0.3967 | 0.4466 | 0.4971 | 0.5961 | 0.6403 | 0.7397 | 1.3488 | 1.8412 | 2.9784 | 15.929 | 0      |

Figure S7: Calculated non-adiabatic coupling matrices of the pristine and defect-bearing  $\text{MA}_2\text{SnPbI}_6$  perovskites.

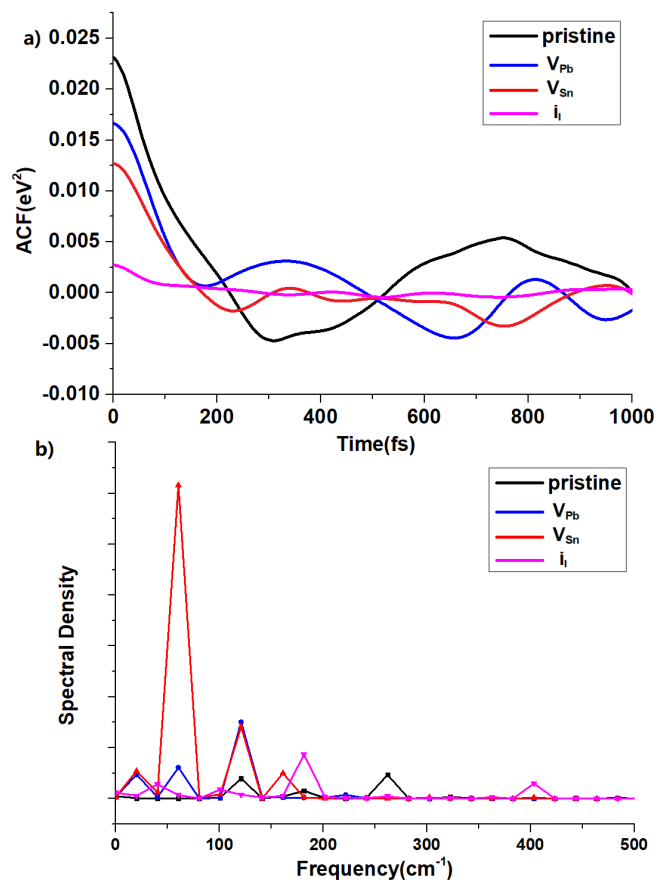

Figure S8: Calculated (a) unnormalized auto-correlation functions and (b) spectral densities of the pristine and defect-bearing  $\text{MA}_2\text{SnPbI}_6$  perovskites.
